# Supplementary material
Source: PubMed Central journal article supplement (PMC4139469)
Supplement: NIHMS613630-supplement-Supp_Fig_1.pdf [file NIHMS613630-supplement-Supp_Fig_1.pdf]

**a hematoxylin staining**

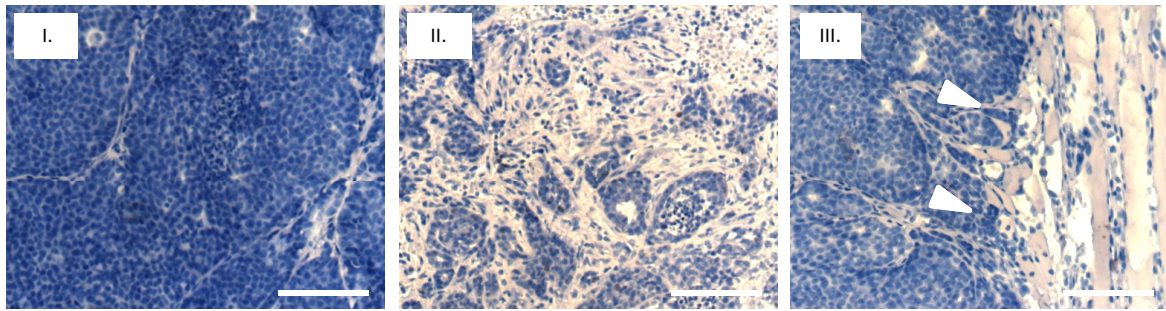

**b human CTSB staining**

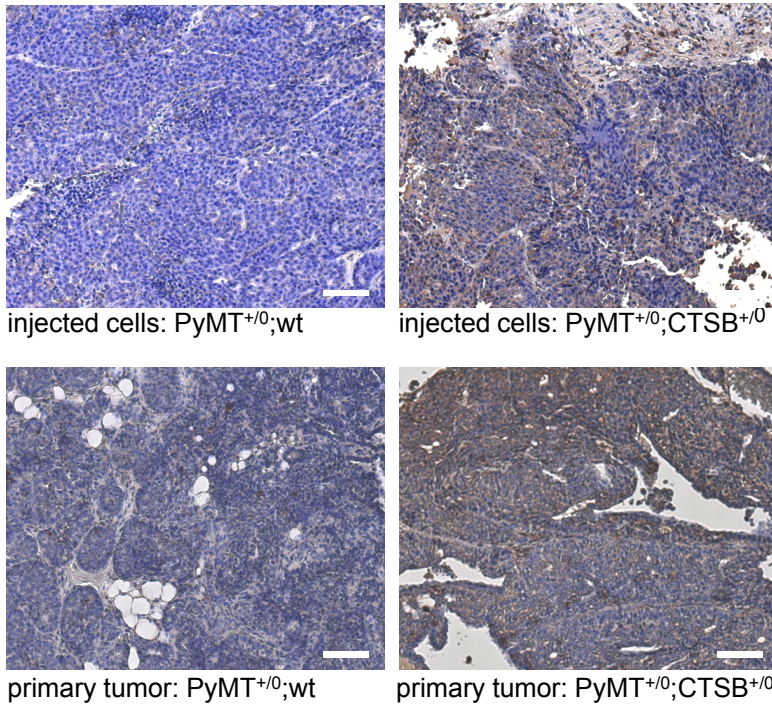

**c F4/80 staining**

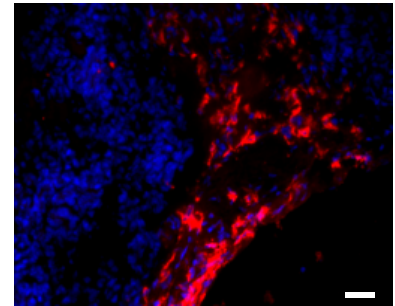

**d CD31 staining**

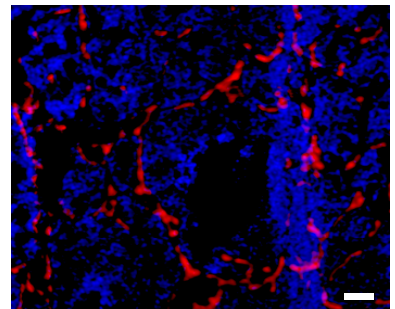

**Supplementary figure 1.** Histology of tumors derived from orthotopic transplantation (OT) of primary PyMT tumor cells. *a*, Hematoxylin staining of different regions of the same tumor showing an undifferentiated region (I.), a stroma-rich site (II.), and the invasive front of the tumor invading into the breast muscle (arrow heads) (III.). *b*, human CTSB peroxidase staining on OT tumors derived from injection of PyMT<sup>+0</sup>;wt and PyMT<sup>+0</sup>;CTSB<sup>+0</sup> cancer cells, primary PyMT<sup>+0</sup>;wt and PyMT<sup>+0</sup>;CTSB<sup>+0</sup> tumors as controls. *c*, F4/80 fluorescence staining on tumor cryosection for monocytes/macrophages. *d*, CD31 fluorescence staining on tumor cryosection for detection of endothelial cells. All scale bars equals 100  $\mu$ m.
