# Supplementary material
Source: PubMed Central journal article supplement (PMC4139469)
Supplement: NIHMS613630-supplement-Supp_Fig_2.pdf [file NIHMS613630-supplement-Supp_Fig_2.pdf]

**a** Ki67 staining

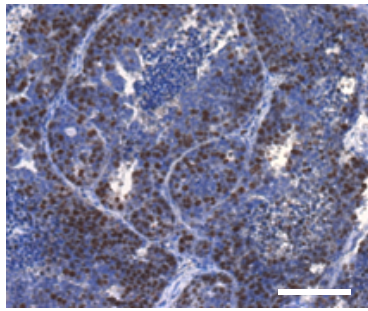

injected cells: PyMT<sup>+/0</sup>;wt

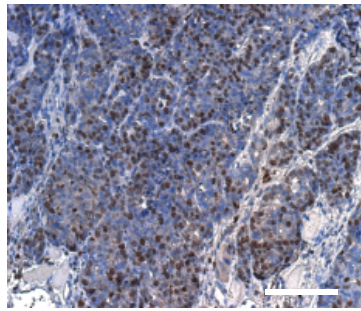

injected cells: PyMT<sup>+/0</sup>;CTSB<sup>+/0</sup>

**b**

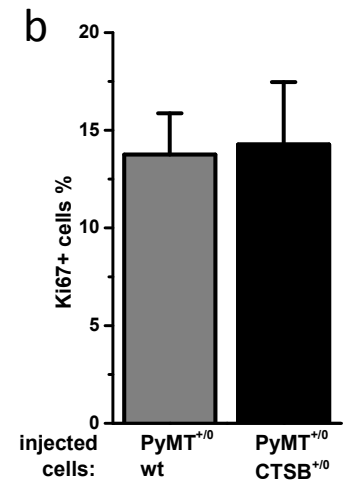

**c** TUNEL staining

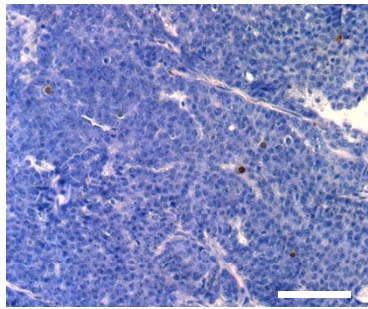

injected cells: PyMT<sup>+/0</sup>;wt

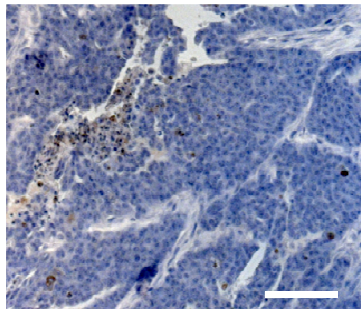

injected cells: PyMT<sup>+/0</sup>;CTSB<sup>+/0</sup>

**d** necrotic area

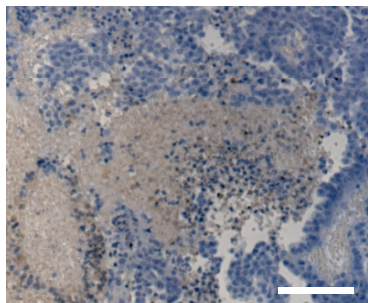

injected cells: PyMT<sup>+/0</sup>;wt

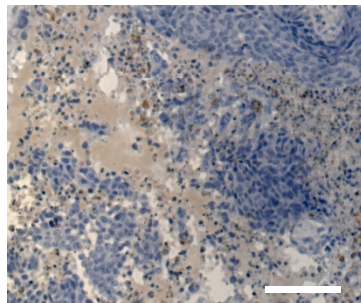

injected cells: PyMT<sup>+/0</sup>;CTSB<sup>+/0</sup>

**e**

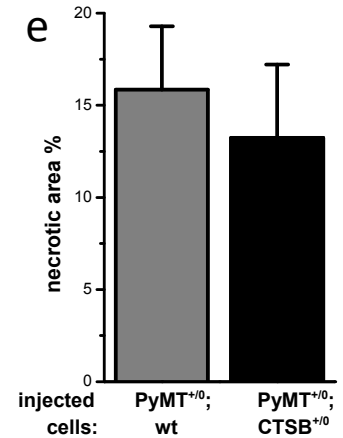

**Supplementary figure 2.** Quantitative histologic analyses of tumors derived from orthotopic transplantation of PyMT tumor cells. *a*, Ki67 peroxidase staining on tumor paraffin section for detection of proliferating cells and *b*, quantitation of Ki67+ cells. *c*, Terminal deoxynucleotidyl transferase dUTP nick end labeling (TUNEL) peroxidase staining on tumor paraffin section for detection of apoptotic cells. *d*, necrotic areas in hematoxylin stained sections and *e*, quantitation of necrotic area.
