# Supplementary material
Source: PubMed Central journal article supplement (PMC4139469)
Supplement: NIHMS613630-supplement-Supp_Fig_4.pdf [file NIHMS613630-supplement-Supp_Fig_4.pdf]

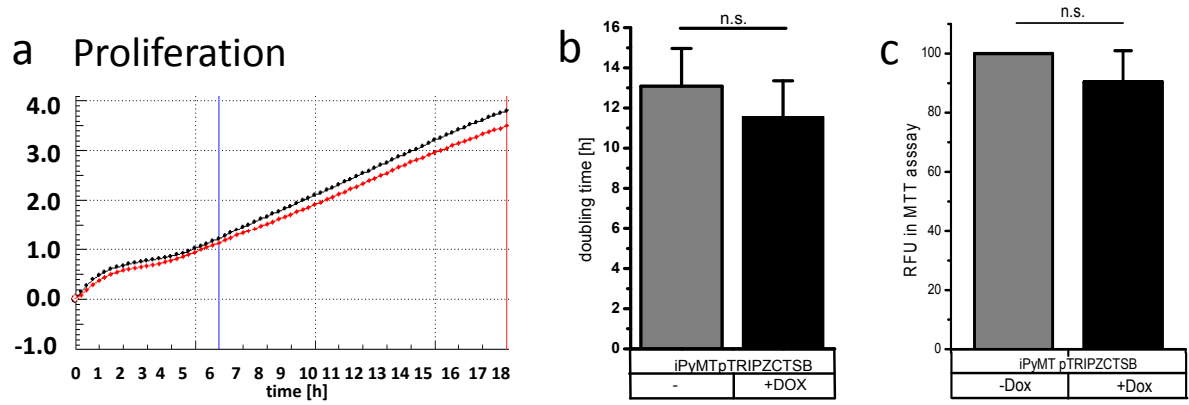

**Supplementary figure 4.** Proliferation of iPyMT cells upon induction of hCTSB expression. *a* and *b*, proliferation curve and calculated doubling time of iPyMT cells upon hCTSB induction by doxycycline (1  $\mu$ M) measured as change of impedance with XCelligence. *c*, MTT assay with iPyMT cells without and with induction of CTSB.
