# Supplementary material
Source: PubMed Central journal article supplement (PMC4139469)
Supplement: NIHMS613630-supplement-Supp_Fig_5.pdf [file NIHMS613630-supplement-Supp_Fig_5.pdf]

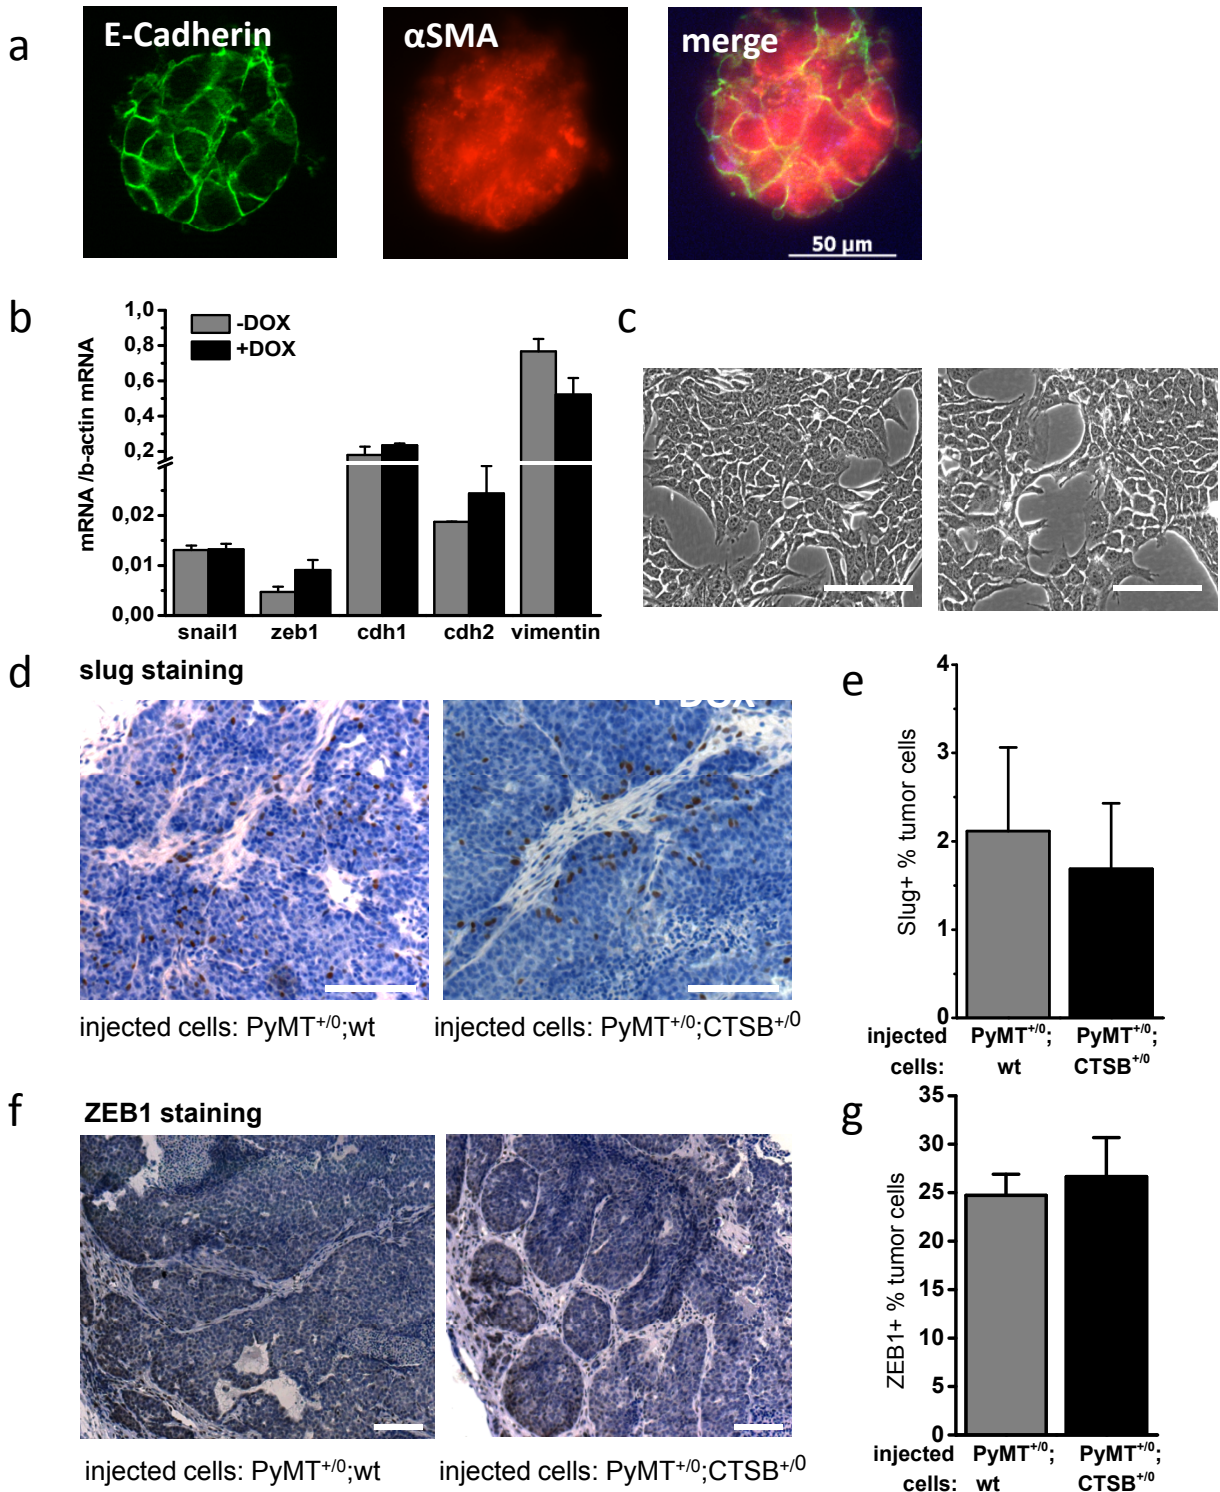

**Supplementary figure 5.** Epithelial-to-mesenchymal transition (EMT) of wt and CTSSB overexpressing cancer cells. *a*, Fluorescence staining for epithelial marker E-cadherin and mesenchymal marker  $\alpha$ SMA in tumor spheroids cultured in reconstructed basement membrane. *b*, mRNA Expression of EMT transcription factors, E-cadherin (cdh1), N-cadherin (cdh2) and vimentin in iPyMT cells upon induction of CTSSB by Doxycycline (1  $\mu$ M) and *c*, representative pictures of cell morphology. *d*, slug peroxidase staining on OT tumors derived from injection of PyMT<sup>+/0</sup>;wt and PyMT<sup>+/0</sup>;CTSSB<sup>+/0</sup> cancer cells and *e*, quantitation of slug positive cells. *f*, ZEB1 peroxidase staining on OT tumors derived from injection of PyMT<sup>+/0</sup>;wt and PyMT<sup>+/0</sup>;CTSSB<sup>+/0</sup> cancer cells and *g*, quantitation of ZEB1 positive cells.
