# Supplementary material
Source: PubMed Central journal article supplement (PMC4139469)
Supplement: NIHMS613630-supplement-Supp_Fig_6.pdf [file NIHMS613630-supplement-Supp_Fig_6.pdf]

**a Migration**

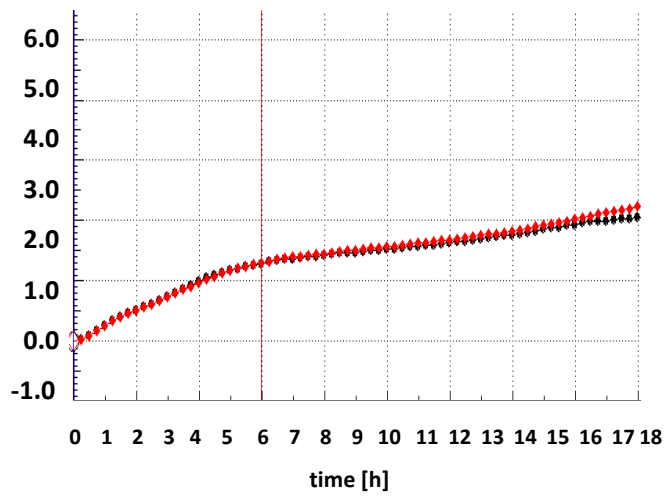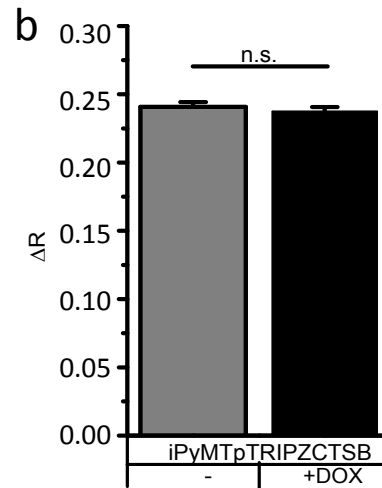

**c Invasion through Collagen I**

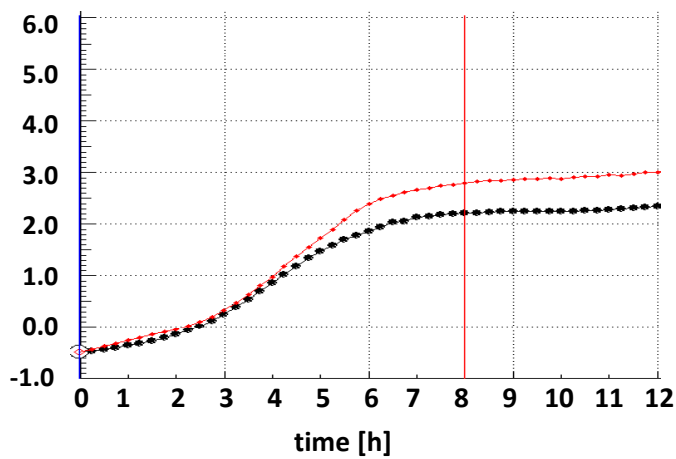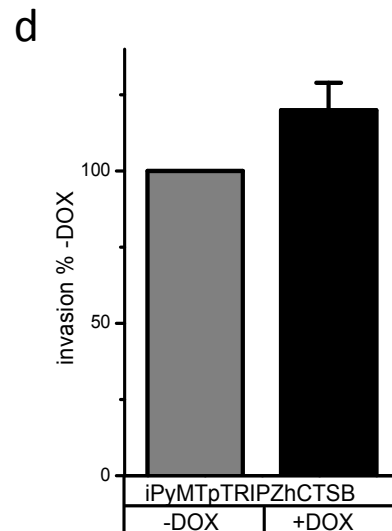

**Supplementary figure 6.** Migration and invasion through collagen I upon hCTSB expression. *a* and *b*, migration curve and calculated migration rate of iPyMT cells through a membrane along an FCS gradient measured as change of impedance with XCelligence. *c* and *d*, invasion curve and calculated invasion rate of iPyMT cells through collagen I (0,1 mg/ml), measured as change of impedance with XCelligence, induction of CTSSB expression by doxycycline (1  $\mu$ M).
