# Supplementary material
Source: PubMed Central journal article supplement (PMC4139469)
Supplement: NIHMS613630-supplement-Supp_Fig_7.pdf [file NIHMS613630-supplement-Supp_Fig_7.pdf]

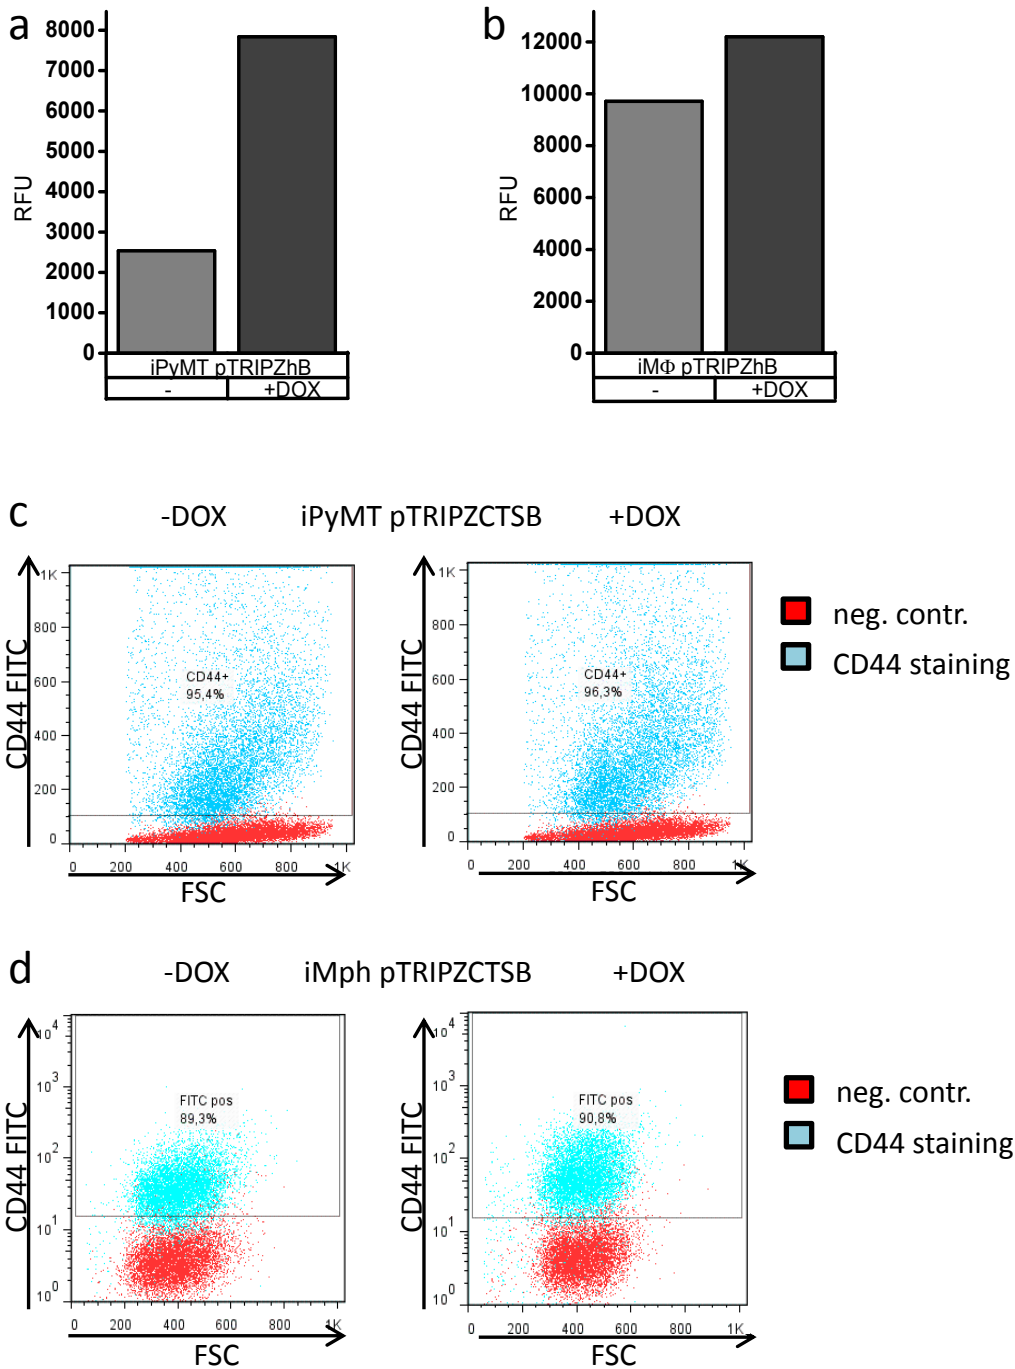

**Supplementary figure 7.** Lysyl oxidase (LOX) activity and CD44 expression in iPMT cells and macrophages upon induction of CTSB expression. *a*, LOX activity detected by enzymatic substrate conversion releasing hydrogen peroxide upon induction of CTSB expression by doxycycline (1  $\mu$ M) in iPMT cells and *b*, in immortalized macrophages. *d*, FACS analysis of CD44 expression upon induction of CTSB expression by doxycycline (1  $\mu$ M) in iPMT cells and *e*, in immortalized macrophages.
