# Supplementary material
Source: PubMed Central journal article supplement (PMC4139469)
Supplement: NIHMS613630-supplement-Supp_Fig_8.pdf [file NIHMS613630-supplement-Supp_Fig_8.pdf]

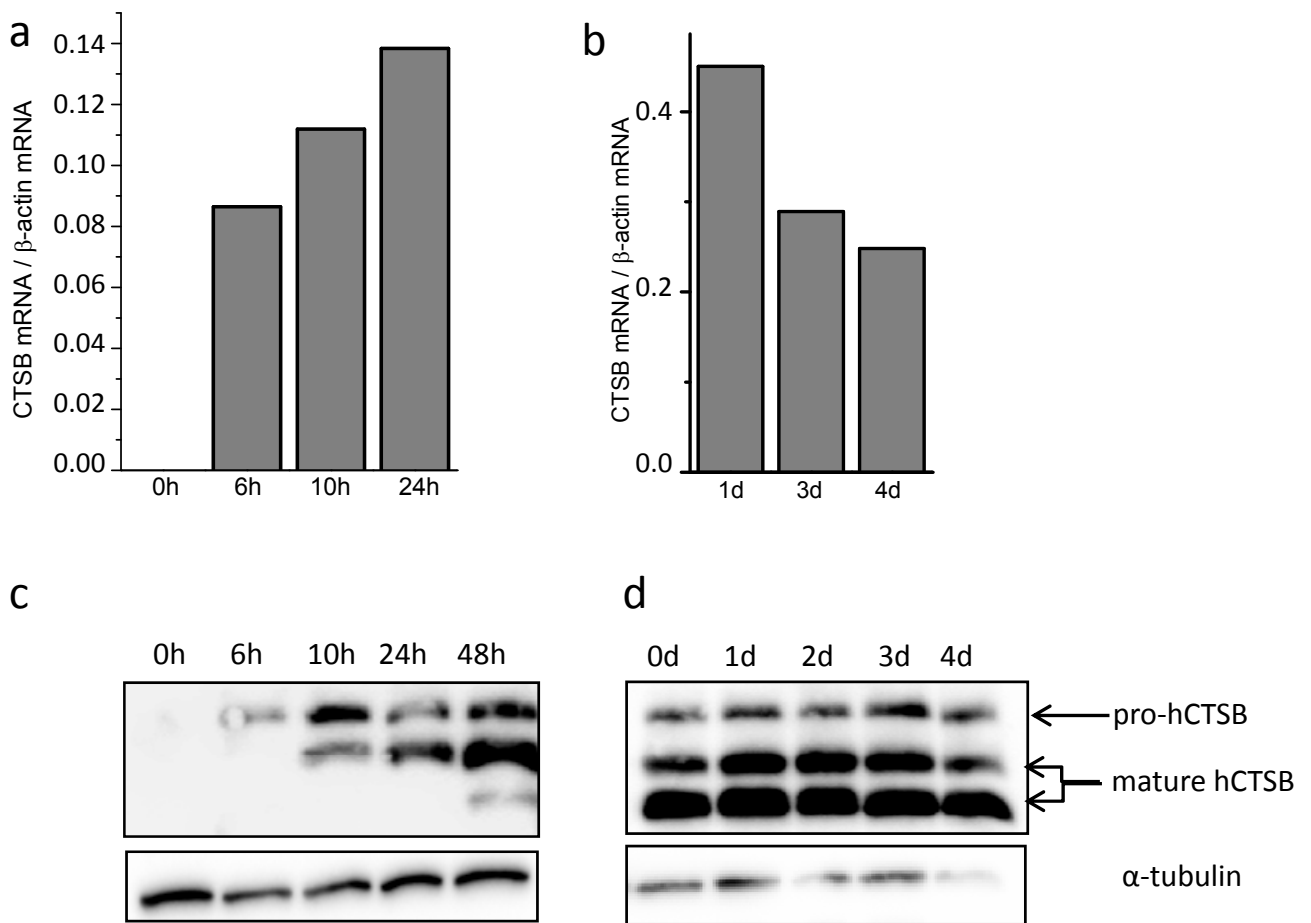

**Supplementary figure 8.** Doxycycline-inducible CTSB expression in immortalized PyMT cells (iPyMT). *a*, quantitative RT-PCR analysis of hCTSB mRNA relative to Actin upon induction with doxycycline (1 $\mu$ M). *b*, quantitative RT-PCR analysis of hCTSB mRNA relative to  $\beta$ -actin after removal of doxycycline. *c*, protein expression of hCTSB detected by western blot upon addition of doxycycline. *d*, protein expression of hCTSB detected by western blot after removal of doxycycline.
