# Supplementary material
Source: PubMed Central journal article supplement (PMC4139469)
Supplement: NIHMS613630-supplement-Supp_Tab_1.pdf [file NIHMS613630-supplement-Supp_Tab_1.pdf]

## Supplementary table1:

### Upregulated genes in CTSB<sup>+0</sup> versus wild-type co-cultures of primary tumor cells and BMDM

Genes were filtered according to the criteria: BH q-value  $\leq 0.05$  (unpaired Bayes t-test) and an effect size  $> 2$ . Probe ID: Affymetrix Identifier; FDR: False discovery rate.

| Probe ID | Gene Description                                                                                 | Gene Symbol         | Effect Size | FDR      |
|----------|--------------------------------------------------------------------------------------------------|---------------------|-------------|----------|
| 10541496 | microfibrillar associated protein 5                                                              | Mfap5               | 3.74        | 6.72E-06 |
| 10532346 | purinergic receptor P2X, ligand-gated ion channel, 2                                             | P2rx2               | 3.34        | 1.14E-02 |
| 10568536 | carboxypeptidase X 2 (M14 family)                                                                | Cpxm2               | 3.20        | 2.40E-07 |
| 10404132 | cytidine monophospho-N-acetylneuraminic acid hydroxylase                                         | Cmah                | 3.13        | 1.06E-03 |
| 10529091 | general transcription factor IIIC, polypeptide 2, beta                                           | Gtf3c2              | 3.09        | 3.99E-06 |
| 10360415 | gremlin 2 homolog, cysteine knot superfamily ( <i>Xenopus laevis</i> )                           | Grem2               | 3.09        | 4.24E-06 |
| 10604542 | heparan sulfate 6-O-sulfotransferase 2                                                           | Hs6st2              | 3.03        | 6.37E-06 |
| 10581013 | cadherin 11                                                                                      | Cdh11               | 2.97        | 3.68E-07 |
| 10555323 | procollagen-proline, 2-oxoglutarate 4-dioxygenase (proline 4-hydroxylase), alpha polypeptide III | P4ha3               | 2.94        | 2.42E-06 |
| 10525989 | G protein-coupled receptor 133                                                                   | Gpr133              | 2.94        | 4.24E-06 |
| 10416406 | 5-hydroxytryptamine (serotonin) receptor 2A                                                      | Htr2a               | 2.91        | 4.44E-05 |
| 10375175 | slit homolog 3 ( <i>Drosophila</i> )                                                             | Slit3               | 2.86        | 6.55E-06 |
| 10379228 | nitric oxide synthase 2, inducible                                                               | Nos2                | 2.81        | 3.45E-02 |
| 10600024 | G-protein-coupled receptor 50                                                                    | Gpr50               | 2.73        | 9.57E-02 |
| 10438904 | leucine rich repeat containing 15                                                                | Lrrc15              | 2.71        | 2.36E-06 |
| 10520452 | interleukin 6                                                                                    | Il6                 | 2.71        | 1.61E-03 |
| 10549222 | branched chain aminotransferase 1, cytosolic                                                     | Bcat1               | 2.70        | 7.01E-07 |
| 10601659 | sushi-repeat-containing protein, X-linked 2                                                      | Srpx2               | 2.69        | 6.21E-06 |
| 10365983 | lumican                                                                                          | Lum                 | 2.68        | 8.58E-07 |
| 10598251 | diacylglycerol kinase kappa                                                                      | Dgkk                | 2.67        | 1.37E-02 |
| 10487937 | prokineticin receptor 2                                                                          | Prokr2              | 2.65        | 1.23E-04 |
| 10585588 | chondroitin sulfate proteoglycan 4                                                               | Cspg4               | 2.63        | 3.24E-06 |
| 10398075 | serine (or cysteine) peptidase inhibitor, clade A, member 3N                                     | Serpina3n           | 2.58        | 3.76E-06 |
| 10345791 | interleukin 1 receptor-like 1                                                                    | Il1rl1              | 2.57        | 1.89E-04 |
| 10563706 | MAS-related GPR, member A9                                                                       | Mrgpra9             | 2.56        | 1.81E-02 |
| 10585438 | cellular retinoic acid binding protein I                                                         | Crabp1              | 2.52        | 3.24E-06 |
| 10351491 | olfactomedin-like 2B                                                                             | Olfml2b             | 2.47        | 9.27E-05 |
| 10375360 | early B-cell factor 1                                                                            | Ebf1                | 2.46        | 2.50E-06 |
| 10559667 | interleukin 11                                                                                   | Il11                | 2.44        | 2.72E-04 |
| 10544573 | leucine rich repeat containing 61 : retinoic acid receptor responder (tazarotene induced) 2      | Rarres2 :<br>Lrrc61 | 2.44        | 1.49E-05 |
| 10348632 | twist homolog 2 ( <i>Drosophila</i> )                                                            | Twist2              | 2.43        | 1.31E-04 |
| 10553833 | necdin                                                                                           | Ndn                 | 2.41        | 9.72E-05 |
| 10514177 | basonuclin 2                                                                                     | Bnc2                | 2.40        | 2.16E-04 |

|          |                                                                                               |               |      |          |
|----------|-----------------------------------------------------------------------------------------------|---------------|------|----------|
| 10365974 | decorin                                                                                       | Dcn           | 2.38 | 3.24E-06 |
| 10486102 | G protein-coupled receptor 176                                                                | Gpr176        | 2.37 | 2.13E-04 |
| 10571142 | G protein-coupled receptor 124                                                                | Gpr124        | 2.33 | 1.20E-03 |
| 10462507 | 3'-phosphoadenosine 5'-phosphosulfate synthase 2                                              | Papss2        | 2.33 | 1.38E-03 |
| 10458663 | dihydropyrimidinase-like 3                                                                    | Dpysl3        | 2.32 | 1.14E-03 |
| 10594044 | immunoglobulin superfamily containing leucine-rich repeat                                     | Islr          | 2.32 | 2.86E-04 |
| 10409579 | chemokine (C-X-C motif) ligand 14                                                             | Cxcl14        | 2.32 | 5.77E-05 |
| 10595324 | 5-hydroxytryptamine (serotonin) receptor 1B                                                   | Htr1b         | 2.32 | 5.49E-03 |
| 10375614 | glutamine fructose-6-phosphate transaminase 2                                                 | Gfpt2         | 2.31 | 1.25E-04 |
| 10458894 | lysyl oxidase                                                                                 | Lox           | 2.31 | 4.54E-04 |
| 10483081 | fibroblast activation protein                                                                 | Fap           | 2.30 | 6.06E-05 |
| 10447951 | thrombospondin 2                                                                              | Thbs2         | 2.29 | 8.26E-07 |
| 10594066 | lysyl oxidase-like 1                                                                          | Loxl1         | 2.29 | 5.71E-05 |
| 10375402 | a disintegrin and metallopeptidase domain 19 (meltrin beta)                                   | Adam19        | 2.29 | 1.64E-03 |
| 10563077 | reticulocalbin 3, EF-hand calcium binding domain                                              | Rcn3          | 2.27 | 6.82E-07 |
| 10416215 | lysyl oxidase-like 2                                                                          | Loxl2         | 2.25 | 2.16E-04 |
| 10427290 | homeobox C8                                                                                   | Hoxc8         | 2.25 | 1.27E-05 |
| 10440019 | transmembrane protein 45a                                                                     | Tmem45a       | 2.24 | 2.49E-04 |
| 10536220 | collagen, type I, alpha 2                                                                     | Col1a2        | 2.23 | 8.97E-06 |
| 10358561 | hemicentin 1                                                                                  | Hmcn1         | 2.22 | 2.12E-04 |
| 10576235 | dipeptidase 1 (renal)                                                                         | Dpep1         | 2.22 | 1.27E-04 |
| 10555174 | leucine rich repeat containing 32                                                             | Lrrc32        | 2.21 | 6.06E-05 |
| 10563597 | serum amyloid A 3                                                                             | Saa3          | 2.18 | 6.65E-02 |
| 10349947 | fibromodulin                                                                                  | Fmod          | 2.17 | 2.16E-04 |
| 10435948 | coiled-coil domain containing 80                                                              | Ccdc80        | 2.17 | 9.44E-06 |
| 10381898 | mannose receptor, C type 2                                                                    | Mrc2          | 2.16 | 4.11E-04 |
| 10359624 | paired related homeobox 1                                                                     | Prrx1         | 2.16 | 6.72E-06 |
| 10380419 | collagen, type I, alpha 1                                                                     | Col1a1        | 2.15 | 2.02E-05 |
| 10593123 | transgelin                                                                                    | Tagln         | 2.15 | 6.55E-06 |
| 10531724 | placenta-specific 8                                                                           | Plac8         | 2.15 | 1.03E-04 |
| 10346882 | a disintegrin and metallopeptidase domain 23                                                  | Adam23        | 2.13 | 2.16E-04 |
| 10375751 | a disintegrin-like and metallopeptidase (reprolysin type) with thrombospondin type 1 motif, 2 | Adamts2       | 2.11 | 6.06E-05 |
| 10485198 | tetraspanin 18                                                                                | Tspan18       | 2.11 | 5.49E-04 |
| 10484463 | serine (or cysteine) peptidase inhibitor, clade G, member 1                                   | Serping1      | 2.10 | 2.67E-04 |
| 10475643 | fibroblast growth factor 7                                                                    | Fgf7          | 2.09 | 1.38E-04 |
| 10376778 | microfibrillar-associated protein 4 : mitogen-activated protein kinase 7                      | Mapk7 : Mfap4 | 2.08 | 6.06E-05 |
| 10433114 | integrin alpha 5 (fibronectin receptor alpha)                                                 | Itga5         | 2.08 | 1.07E-04 |
| 10358587 | hemicentin 1                                                                                  | Hmcn1         | 2.08 | 2.66E-03 |
| 10373912 | oncostatin M                                                                                  | Osm           | 2.07 | 9.66E-02 |
| 10501608 | vascular cell adhesion molecule 1                                                             | Vcam1         | 2.07 | 8.35E-04 |
| 10363735 | early growth response 2                                                                       | Egr2          | 2.05 | 7.59E-04 |
| 10556616 | transmembrane channel-like gene family 5                                                      | Tmc5          | 2.05 | 8.55E-02 |

|          |                                                             |          |      |          |
|----------|-------------------------------------------------------------|----------|------|----------|
| 10379524 | chemokine (C-C motif) ligand 11                             | Ccl11    | 2.04 | 1.47E-03 |
| 10349157 | serine (or cysteine) peptidase inhibitor, clade B, member 2 | Serpinb2 | 2.03 | 2.40E-02 |
| 10370210 | collagen, type VI, alpha 1                                  | Col6a1   | 2.03 | 1.88E-03 |
| 10359929 | discoidin domain receptor family, member 2                  | Ddr2     | 2.02 | 7.34E-04 |
| 10351400 | family with sequence similarity 78, member B                | Fam78b   | 2.02 | 4.01E-04 |
| 10398420 | microRNA 382                                                | Mir382   | 2.02 | 2.93E-03 |
| 10423080 | C1q and tumor necrosis factor related protein 3             | C1qtnf3  | 2.02 | 4.43E-03 |
| 10519983 | fibrinogen-like protein 2                                   | Fgl2     | 2.02 | 2.42E-04 |
| 10592719 | OAF homolog (Drosophila)                                    | Oaf      | 2.01 | 4.40E-04 |
| 10351293 | dermatopontin                                               | Dpt      | 2.00 | 1.64E-03 |
