# Supplementary material
Source: PubMed Central journal article supplement (PMC4139469)
Supplement: NIHMS613630-supplement-Supp_Tab_2.pdf [file NIHMS613630-supplement-Supp_Tab_2.pdf]

## Supplementary table2:

### Downregulated genes in CTSB<sup>+0</sup> versus wild-type co-cultures of primary tumor cells and BMDM

Genes were filtered according to the criteria: BH q-value  $\leq 0.05$  (unpaired Bayes t-test) and an effect size  $> 2$ .  
Probe ID: Affymetrix Identifier; FDR: False discovery rate.

| Probe ID | Gene Description                                                                         | Gene Symbol           | Effect Size | FDR      |
|----------|------------------------------------------------------------------------------------------|-----------------------|-------------|----------|
| 10551293 | cytochrome P450, family 2, subfamily f, polypeptide 2                                    | Cyp2f2                | 7.42        | 3.68E-07 |
| 10403420 | isopentenyl-diphosphate delta isomerase 2                                                | Idi2                  | 6.61        | 3.83E-03 |
| 10457707 | desmocollin 1                                                                            | Dsc1                  | 6.58        | 5.49E-03 |
| 10407537 | isopentenyl-diphosphate delta isomerase 2                                                | Idi2                  | 6.36        | 3.89E-04 |
| 10455446 | serine peptidase inhibitor, Kazal type 11                                                | Spink12               | 5.45        | 4.85E-02 |
| 10469786 | interleukin 1 family, member 9                                                           | Il1f9                 | 4.48        | 5.44E-02 |
| 10499891 | small proline-rich protein 1B                                                            | Sprr1b                | 4.33        | 5.73E-02 |
| 10552462 | kallikrein related-peptidase 14                                                          | Klk14                 | 4.32        | 9.53E-02 |
| 10454113 | desmoglein 1 alpha : desmoglein 1 beta : desmoglein 1 gamma                              | Dsg1c : Dsg1a : Dsg1b | 3.86        | 7.53E-02 |
| 10432897 | keratin 79                                                                               | Krt79                 | 3.83        | 4.16E-02 |
| 10511353 | short chain dehydrogenase/reductase family 16C, member 6                                 | Sdr16c6               | 3.73        | 4.47E-02 |
| 10469774 | interleukin 1 family, member 8                                                           | Il1f8                 | 3.69        | 5.55E-02 |
| 10494016 | thioesterase superfamily member 5                                                        | Them5                 | 3.45        | 4.58E-02 |
| 10522827 | casein alpha s1                                                                          | Csn1s1                | 3.40        | 2.03E-04 |
| 10467206 | protein phosphatase 1, regulatory (inhibitor) subunit 3C                                 | Ppp1r3c               | 3.13        | 4.93E-03 |
| 10539449 | ATPase, H <sup>+</sup> transporting, lysosomal V1 subunit B1                             | Atp6v1b1              | 3.04        | 6.29E-02 |
| 10530960 | transmembrane protease, serine 11d                                                       | Tmprss11d             | 3.03        | 9.55E-02 |
| 10443854 | cytochrome P450, family 4, subfamily f, polypeptide 39                                   | Cyp4f39               | 2.92        | 4.32E-02 |
| 10366546 | carboxypeptidase M                                                                       | Cpm                   | 2.83        | 1.28E-02 |
| 10581605 | haptoglobin                                                                              | Hp                    | 2.82        | 4.54E-04 |
| 10431962 | endonuclease, polyU-specific                                                             | Endou                 | 2.71        | 8.69E-02 |
| 10419261 | bone morphogenetic protein 4                                                             | Bmp4                  | 2.67        | 1.96E-03 |
| 10428376 | angiopoietin 1                                                                           | Angpt1                | 2.64        | 3.39E-03 |
| 10359689 | ATPase, Na <sup>+</sup> /K <sup>+</sup> transporting, beta 1 polypeptide                 | Atp1b1                | 2.58        | 8.94E-03 |
| 10421853 | leukocyte cell derived chemotaxin 1                                                      | Lect1                 | 2.57        | 5.57E-02 |
| 10545096 | melanoma antigen family B, 16, pseudogene 1 : melanoma antigen family B, 16              | Mageb16 : Mageb16-ps1 | 2.51        | 7.28E-02 |
| 10569344 | insulin-like growth factor 2                                                             | Igf2                  | 2.51        | 3.99E-06 |
| 10493856 | small proline-rich protein 2A1 : small proline-rich protein 2A3                          | Sprr2a1 : Sprr2a3     | 2.49        | 5.54E-02 |
| 10493858 | small proline-rich protein 2A1 : small proline-rich protein 2A3                          | Sprr2a1 : Sprr2a3     | 2.49        | 5.54E-02 |
| 10440647 | claudin 8                                                                                | Cldn8                 | 2.46        | 1.48E-03 |
| 10462313 | solute carrier family 1 (neuronal/epithelial high affinity glutamate transporter, system | Slc1a1                | 2.44        | 2.13E-03 |

|          |                                                                                                  |                                   |      |          |
|----------|--------------------------------------------------------------------------------------------------|-----------------------------------|------|----------|
|          | Xag), member 1                                                                                   |                                   |      |          |
| 10390860 | keratin 23                                                                                       | Krt23                             | 2.40 | 2.42E-02 |
| 10493850 | small proline-rich protein 2A1 : small proline-rich protein 2A2 : small proline-rich protein 2A3 | Sprr2a1 :<br>Sprr2a2 :<br>Sprr2a3 | 2.34 | 4.85E-02 |
| 10380398 | chondroadherin                                                                                   | Chad                              | 2.32 | 6.16E-03 |
| 10434719 | kininogen 1                                                                                      | Kng1                              | 2.31 | 1.07E-04 |
| 10497203 | hairy/enhancer-of-split related with YRPW motif 1                                                | Hey1                              | 2.30 | 2.42E-02 |
| 10444883 | corneodesmosin                                                                                   | Cdsn                              | 2.25 | 2.84E-02 |
| 10485700 | butyrobetaine (gamma), 2-oxoglutarate dioxygenase 1 (gamma-butyrobetaine hydroxylase)            | Bbox1                             | 2.22 | 5.44E-02 |
| 10387821 | arachidonate 12-lipoxygenase                                                                     | Alox12                            | 2.19 | 6.20E-02 |
| 10439282 | cystatin A                                                                                       | Csta                              | 2.18 | 5.23E-02 |
| 10514576 | KN motif and ankyrin repeat domains 4                                                            | Kank4                             | 2.18 | 4.30E-02 |
| 10406461 | microRNA 9-2                                                                                     | Mir9-2                            | 2.18 | 3.26E-02 |
| 10503502 | tocopherol (alpha) transfer protein                                                              | Ttpa                              | 2.17 | 7.44E-02 |
| 10579442 | solute carrier family 5 (sodium iodide symporter), member 5                                      | Slc5a5                            | 2.16 | 7.02E-05 |
| 10407416 | calmodulin-like 3                                                                                | Calml3                            | 2.16 | 5.44E-02 |
| 10416023 | scavenger receptor class A, member 5 (putative)                                                  | Scara5                            | 2.14 | 2.77E-02 |
| 10521892 | solute carrier family 34 (sodium phosphate), member 2                                            | Slc34a2                           | 2.13 | 1.98E-02 |
| 10445061 | ring finger protein 39                                                                           | Rnf39                             | 2.12 | 4.58E-02 |
| 10599008 | solute carrier family 6 (neurotransmitter transporter), member 14                                | Slc6a14                           | 2.09 | 2.46E-02 |
| 10394954 | grainyhead-like 1 (Drosophila)                                                                   | Grhl1                             | 2.08 | 9.43E-02 |
| 10382321 | potassium inwardly-rectifying channel, subfamily J, member 2                                     | Kcnj2                             | 2.02 | 1.81E-02 |
| 10472757 | cytochrome b reductase 1                                                                         | Cybrd1                            | 2.01 | 3.26E-02 |
| 10390897 | keratin associated protein 1-5                                                                   | Krtap1-5                          | 2.01 | 3.86E-02 |
| 10399470 | tribbles homolog 2 (Drosophila)                                                                  | Trib2                             | 2.00 | 9.00E-03 |
